# Supplementary material for: Amyloid Formation in Nanoliter Droplets
Source: MDPI journal article supplement (doi:10.3390/ijms23105480), 2022-05-13
Supplement: s1 [file s1]

Supplementary figures:

## Amyloid Formation in Nanoliter Droplets

Da Yeon Cheong<sup>1,2,†</sup>, Wonseok Lee<sup>3,†</sup>, Insu Park<sup>4</sup>, Jinsung Park<sup>5,\*</sup>, and Gyudo Lee<sup>1,2,\*</sup>

<sup>1</sup>Department of Biotechnology and Bioinformatics, Korea University, Sejong 30019, Korea

<sup>2</sup>Interdisciplinary Graduate Program for Artificial Intelligence Smart Convergence Technology, Korea University, Sejong 30019, Korea

<sup>3</sup>Department of Electrical Engineering, Korea National University of Transportation, Chungju 27469, Korea

<sup>4</sup>Nick Holonyak Jr. Micro and Nanotechnology Laboratory, University of Illinois at Urbana-Champaign, Urbana, IL 61801, USA

<sup>5</sup>Department of Biomechatronic Engineering, College of Biotechnology and Bioengineering, Sungkyunkwan University, Suwon 16419, Korea

\*Correspondence: nanojspark@skku.edu (J.P.); lk0807@korea.ac.kr (G.L.)

<sup>†</sup>These authors contributed equally to this work.

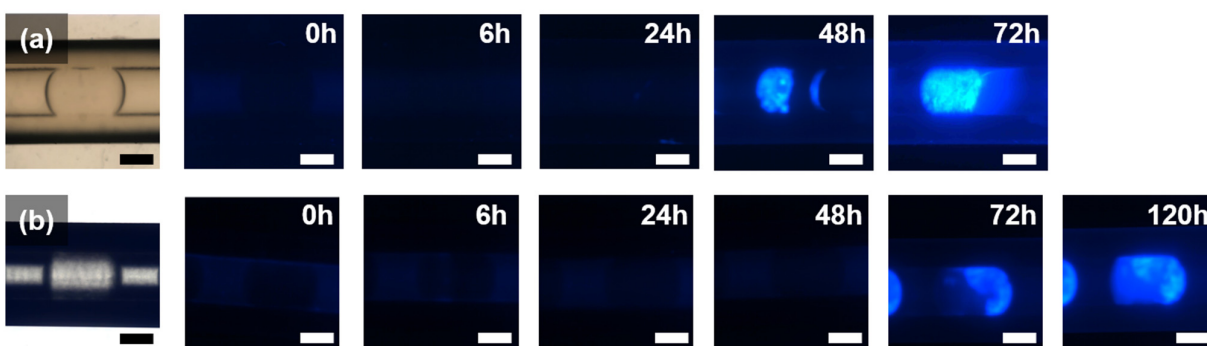

**Figure S1.** Amyloid fibrillation in nanoliter droplets. Bright-field images of nanoliter droplets depend on protein concentration ((a) 3 wt% HEWL (b) 1 wt% HEWL), and corresponding fluorescence images of nanoliter droplets during incubation. The droplet volume for (a) and (b) is 239.7 nL and 237.8 nL, respectively. (Scale bar: 500  $\mu$ m).

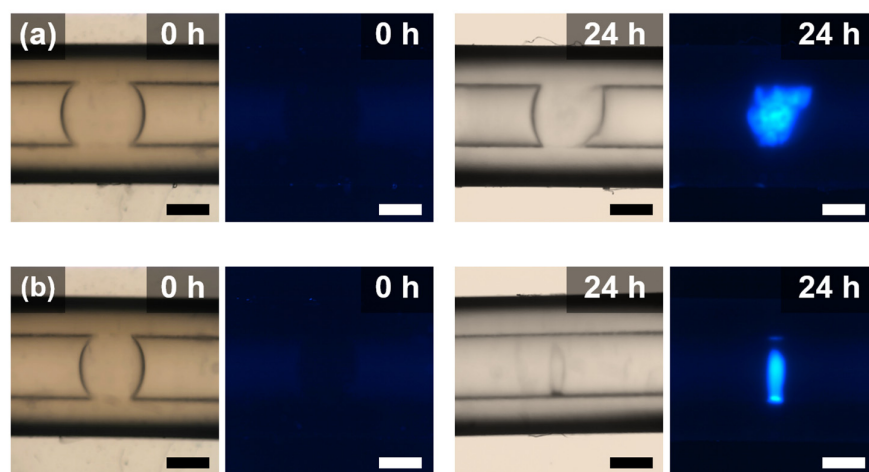

**Figure S2.** Droplet shrinking phenomenon. (a) 188.7 nL droplet (b) 147.9 nL droplet.
